# Supplementary figures and images for: Transcriptome-Wide Study of mRNAs and lncRNAs Modified by m6A RNA Methylation in the Longissimus Dorsi Muscle Development of Cattle-Yak
Source: MDPI journal article supplement (doi:10.3390/cells11223654), 2022-11-17

CY18-vs-CY6:p-value<0.05&& |log2FC|>0.58

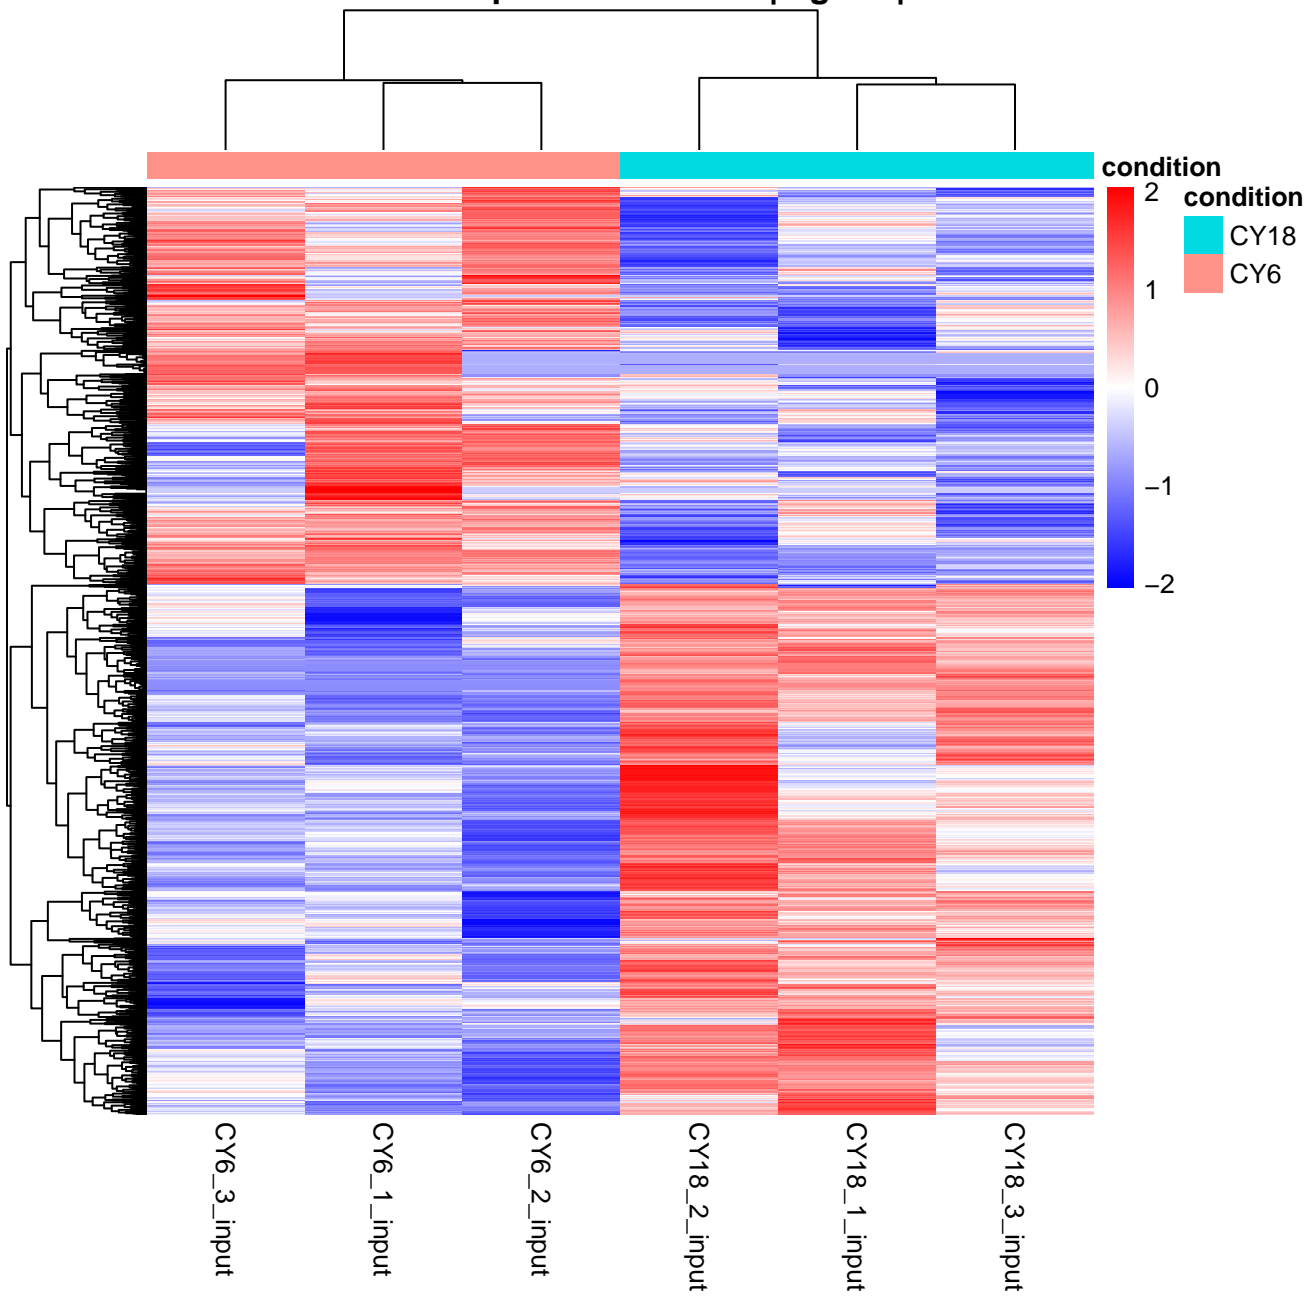

Supplement: s1 [file s1]
